# Supplementary material
Source: PubMed Central journal article supplement (PMC4981772)
Supplement: NIHMS808668-supplement-Supplemental_Materials.pdf [file NIHMS808668-supplement-Supplemental_Materials.pdf]

**A thiol-disulfide oxidoreductase of the Gram-positive pathogen *Corynebacterium diphtheriae* is essential for viability, pilus assembly, toxin production, and virulence**

**Melissa E. Reardon-Robinson,<sup>1</sup> Jerzy Osipiuk,<sup>2,3</sup> Neda Jooya,<sup>1</sup> Chungyu Chang,<sup>1</sup> Andrzej Joachimiak<sup>2,3</sup> Asis Das,<sup>4</sup> and Hung Ton-That<sup>1\*</sup>**

<sup>1</sup>*Department of Microbiology & Molecular Genetics, University of Texas Health Science Center, Houston, TX, USA*

<sup>2</sup>*Midwest Center for Structural Genomics, Department of Biosciences, Argonne National Laboratory, Argonne, IL, USA*

<sup>3</sup>*Structural Biology Center, Argonne National Laboratory, Department of Biosciences, Argonne, IL, USA*

<sup>4</sup>*Department of Molecular Biology and Biophysics, University of Connecticut Health Center, Farmington, CT, USA*

\*To whom correspondence should be addressed:

Hung Ton-That

Department of Microbiology and Molecular Genetics

University of Texas Health Science Center

6431 Fannin Street, R224/MSE

Houston, TX 77030, USA

E-mail: [ton-that.hung@uth.tmc.edu](mailto:ton-that.hung@uth.tmc.edu);

Tel. (+1) 713 500 5468; Fax (+1) 713 500 5499

Running title: *Gram-positive protein folding required for virulence*

## SUPPLEMENTAL INFORMATION

**Figure S1:** Sequence alignment, based on structure homology, of *C. diphtheriae* MdbA and indicated *M. tuberculosis*, *B. subtilis*, *S. aureus* and *E.coli* DsbA-like proteins performed by DALI server (Holm & Rosenstrom, 2010). Depiction of the secondary structure of the MdbA protein was generated by ESPript/ENDscript server (Robert & Gouet, 2014). PDBs of the DsbA-like proteins are shown on the left.  $\alpha$ -helices,  $\beta$ -strands and  $3_{10}$  helices are labeled as  $\alpha 1 - \alpha 7$ ,  $\beta 0 - \beta 5$ , and  $\eta 1 - \eta 2$ , respectively.

## Supplemental Tables

**Table S1:** Bacterial strains and plasmids used in this study

| Strain or plasmid                    | Description                                                     | Reference                          |
|--------------------------------------|-----------------------------------------------------------------|------------------------------------|
| <b><i>C. diphtheriae</i> Strains</b> |                                                                 |                                    |
| NCTC13129                            | Parental Strain (WT)                                            | (Ton-That & Schneewind, 2003)      |
| HT11                                 | $\Delta spaA$                                                   | (Ton-That & Schneewind, 2003)      |
| HT11 pSpaA                           | HT11 containing pSpaA                                           | (Ton-That & Schneewind, 2003)      |
| HT11 pC383A                          | HT11 containing pSpaA <sub>C383A</sub>                          | This Study                         |
| HT11 pC483A                          | HT11 containing pSpaA <sub>C443A</sub>                          | This Study                         |
| NJ2                                  | $\Delta mdbA$                                                   | This Study                         |
| NJ6                                  | NJ2 containing pMdbA                                            | This Study                         |
| MR118                                | NJ2 containing pDsbA <sub>TM</sub>                              | This Study                         |
| HT3                                  | $\Delta srtA\Delta srtF$                                        | (Swaminathan <i>et al.</i> , 2007) |
| HT28                                 | $\Delta tox$                                                    | This Study                         |
| XM5                                  | $\Delta spaA-I$                                                 | This Study                         |
| <b><i>E. coli</i> Strains</b>        |                                                                 |                                    |
| MR128                                | BL21 containing pMCSG7-MdbA <sub>Cd</sub>                       | This Study                         |
| <b>Plasmids</b>                      |                                                                 |                                    |
| pCGL0243                             | <i>Corynebacterium/E. coli</i> shuttle vector, Kan <sup>R</sup> | (Ankri <i>et al.</i> , 1996)       |
| pK19MobsacB                          | <i>Corynebacterium</i> integration plasmid                      | (Schafer <i>et al.</i> , 1994)     |
| pMCSG7                               | Ligation-independent cloning for protein expression             | (Stols <i>et al.</i> , 2002)       |

|                                |                                                                                        |                               |
|--------------------------------|----------------------------------------------------------------------------------------|-------------------------------|
| pSpaA                          | pCGL0243 expressing WT <i>spaA</i>                                                     | (Ton-That & Schneewind, 2003) |
| pSpaA <sub>C383A</sub>         | pSpaA harboring a C383A mutation                                                       | (Ton-That & Schneewind, 2003) |
| pSpaA <sub>C443A</sub>         | pSpaA harboring a C443A mutation                                                       | (Ton-That & Schneewind, 2003) |
| pMdbA                          | pCGL0243 expressing WT <i>mdbA<sub>Cd</sub></i>                                        | This Study                    |
| pMdbA <sub>C94A</sub>          | pMdbA harboring a C94A mutation                                                        | This Study                    |
| pDsbA <sub>TM</sub>            | <i>E. coli</i> DsbA fused to the N-terminal signal peptide and membrane anchor of MdbA | This Study                    |
| pK19mobsacB-MdbA <sub>Cd</sub> | pK19mobsacB allelic replacement of <i>mdbA<sub>Cd</sub></i>                            | This Study                    |
| pMCSG7-MdbA                    | For expression of recombinant MdbA                                                     | This Study                    |

---

**Table S2** Primers used in this study

| Primer                             | Sequence <sup>(a)</sup>                        | Used for:                  |
|------------------------------------|------------------------------------------------|----------------------------|
| <i>spaA</i> _F_C383A               | GCCGAGGCCGACGGCAGCCTAGTCAAGTCCGAC              | pSpaA <sub>C383A</sub>     |
| <i>spaA</i> _R_C383A               | ACGATGCAGCTGGAACGTCGCGGTGCGATCG<br>GC          | pSpaA <sub>C383A</sub>     |
| <i>spaA</i> _F_C443A               | GGCAAGGGAACCGAATTCGCCCTGGTAGAAAC<br>A          | pSpaA <sub>C443A</sub>     |
| <i>spaA</i> _R_C443A               | GGCCCACGCGTCCGGTATATTTTCATAACATTGG<br>A        | pSpaA <sub>C443A</sub>     |
| <i>dsbA</i> <sub>Ec</sub> _F       | GCGCAGTATGAAGATGGTAAACAG                       | pDsbA <sub>TM</sub>        |
| <i>dsbA</i> <sub>Ec</sub> _R_BamHI | <u>AAGGATCCG</u> CCCGTGAA TATTCA CGGGCTT       | pDsbA <sub>TM</sub>        |
| <i>mdbA</i> _A_F_HindIII           | <u>AAGCTTA</u> ATGGCACCGTATGGTCTGACT           | pK19mobsacB-<br>MdbA       |
| <i>mdbA</i> _B_R                   | CCCATCCACTAAACTTAAACACCTAGAACCAGC<br>GTTTTTACT | pK19mobsacB-<br>MdbA       |
| <i>mdbA</i> _C_F                   | TGTTTAAGTTTAGTGGATGGGTGGGTTGAGCA<br>AGCAACC    | pK19mobsacB-<br>MdbA       |
| <i>mdbA</i> _D_R_XbaI              | <u>TCTAGA</u> AAGAACTCACTGACACAAGCCC           | pK19mobsacB-<br>MdbA       |
| <i>mdbA</i> _BamHI_F               | AA <u>AGGATCC</u> CGCCTTCGCACGGTTCTTCAT        | pMdbA, pDsbA <sub>TM</sub> |
| <i>mdbA</i> _BamHI_R               | AA <u>AGGATCC</u> TTAGTGATGGTG                 | pMdbA                      |
| <i>PmdbA</i> _TM_R                 | CACAACAACATAGGTCACAAC                          | pDsbA <sub>TM</sub>        |
| <i>mdbA</i> _C94A_F                | GCCGCCGAGCTTGGCGAGGTCACCGATGG                  | pMdbA <sub>C94A</sub>      |
| <i>mdbA</i> _C94A_F                | ATG TGG GCA CGA GAA GTC CTC GTA GAA GTC        | pMdbA <sub>C94A</sub>      |
| Lic_ <i>mdbA</i> _ANK_F            | TACTTCCAATCCAATGCAGTGCAGGGCAAAGCAC<br>AC       | pMCSG7- MdbA               |
| Lic_ <i>mdbA</i> _ATS_R            | TTATCCACTTCCAATGTTAAGAGGTTGCTTGCTCA<br>ACCC    | pMCSG7- MdbA               |

\*Restriction sites are underlined

## References

- Ankri, S., O. Reyes & G. Leblon, (1996) Electrotransformation of highly DNA-restrictive corynebacteria with synthetic DNA. *Plasmid* **35**: 62-66.
- Holm, L. & P. Rosenstrom, (2010) Dali server: conservation mapping in 3D. *Nucleic Acids Res* **38**: W545-549.
- Robert, X. & P. Gouet, (2014) Deciphering key features in protein structures with the new ENDscript server. *Nucleic Acids Res* **42**: W320-324.
- Schafer, A., A. Tauch, W. Jager, J. Kalinowski, G. Thierbach & A. Puhler, (1994) Small mobilizable multi-purpose cloning vectors derived from the *Escherichia coli* plasmids pK18 and pK19: selection of defined deletions in the chromosome of *Corynebacterium glutamicum*. *Gene* **145**: 69-73.
- Stols, L., M. Gu, L. Dieckman, R. Raffin, F. R. Collart & M. I. Donnelly, (2002) A new vector for high-throughput, ligation-independent cloning encoding a tobacco etch virus protease cleavage site. *Protein Expr Purif* **25**: 8-15.
- Swaminathan, A., A. Mandlik, A. Swierczynski, A. Gaspar, A. Das & H. Ton-That, (2007) Housekeeping sortase facilitates the cell wall anchoring of pilus polymers in *Corynebacterium diphtheriae*. *Mol Microbiol* **66**: 961-974.
- Ton-That, H. & O. Schneewind, (2003) Assembly of pili on the surface of *Corynebacterium diphtheriae*. *Mol Microbiol* **50**: 1429-1438.

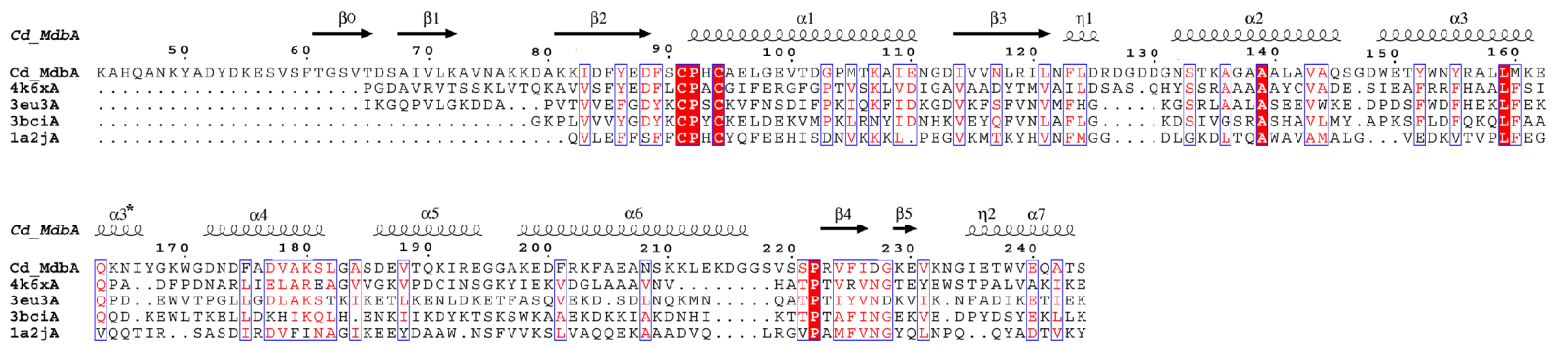

Figure S1: Reardon-Robinson et al.
